# Supplementary material for: Volatile Compositions of Panax ginseng and Panax quinquifolium Grown for Different Cultivation Years
Source: MDPI journal article supplement (doi:10.3390/foods12010136), 2022-12-27

**Figure S1.** Discriminant analysis of four different white ginseng roots grown for 3–6 years based on volatile compound data obtained from GC–MS. (A) PCA and (B) PLS-DA score plot.

(A)

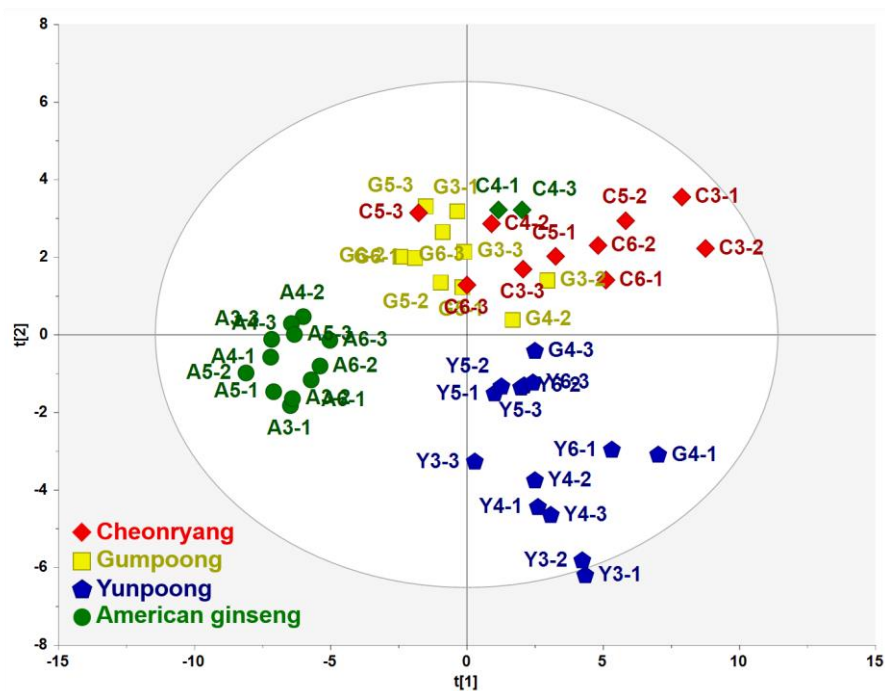

(B)

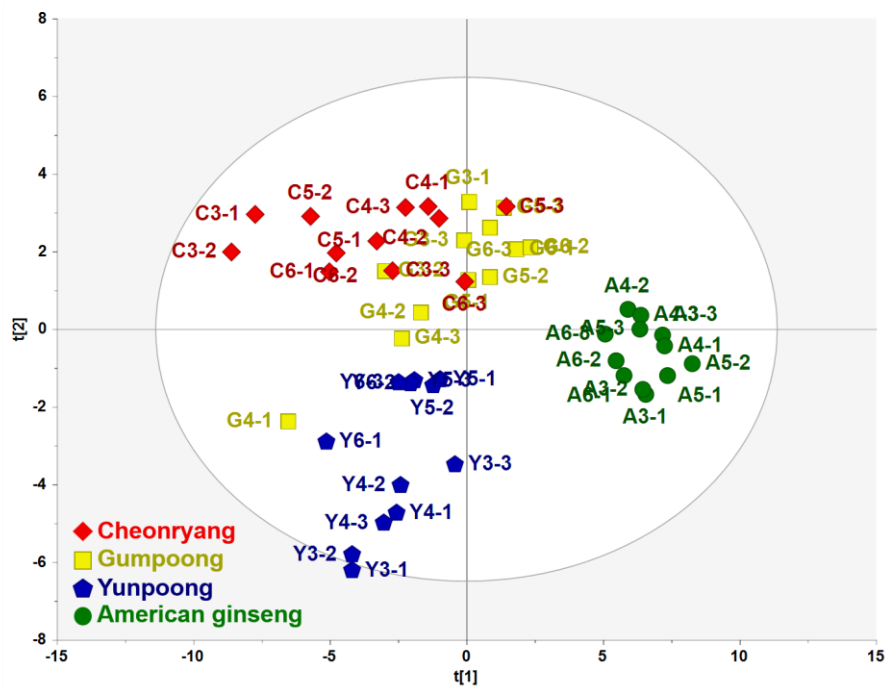

**Figure S2.** PLS-DA score plot of four different white ginseng roots based on volatile compound data obtained from GC–MS. (A) 3-year-old, (B) 4-year-old, (C) 5-year-old, and (D) 6-year-old ginseng roots.

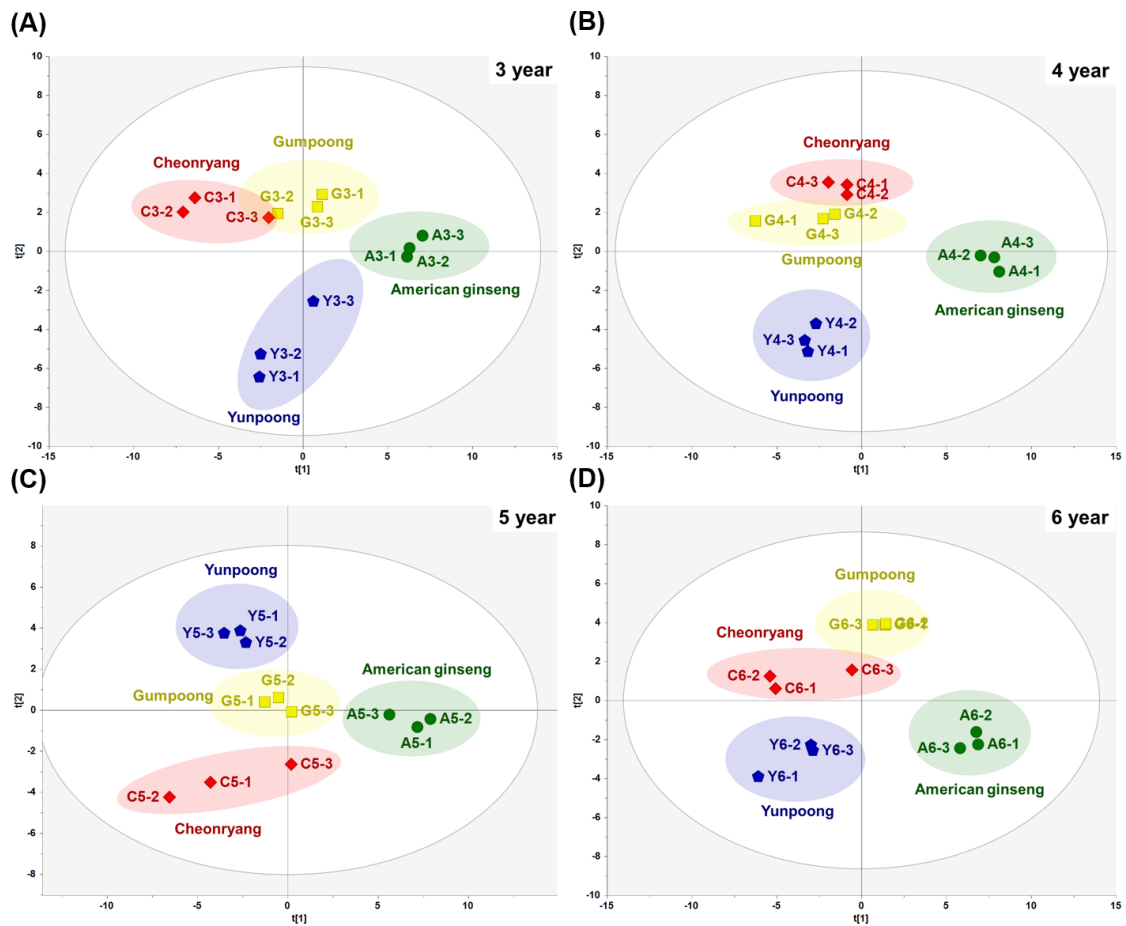

**Figure S3.** The VIP scores calculated from PLS-DA analysis on volatile compounds of four different white ginseng roots. (A) 3-year-old, (B) 4-year-old, (C) 5-year-old, (D) 6-year-old ginseng roots.

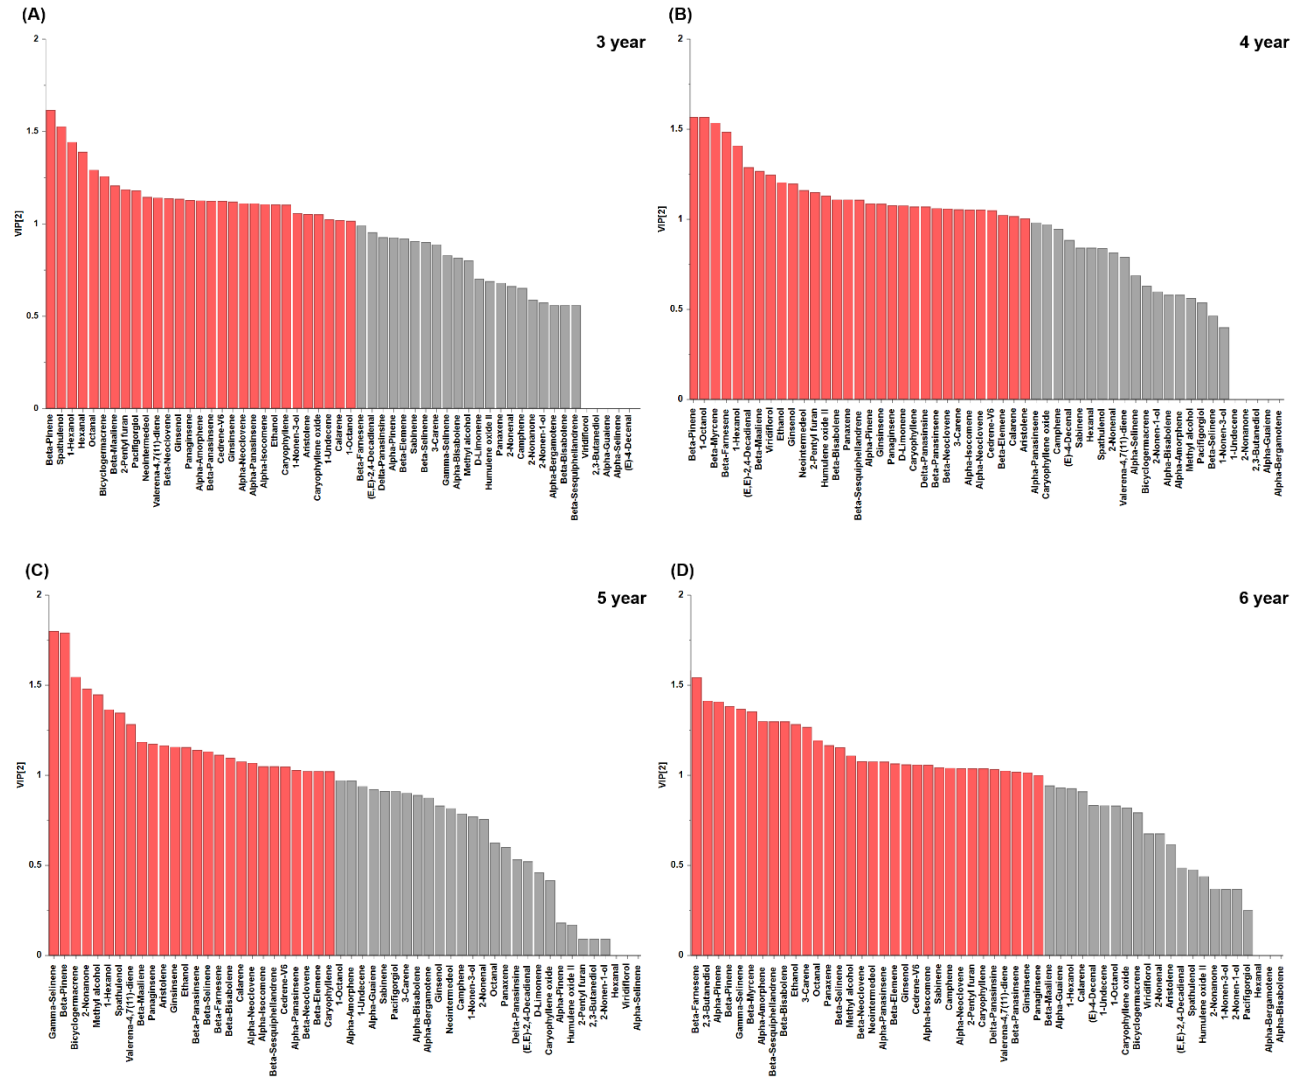

**Figure S4.** Heap map and HCA clustering results of the discriminant volatile compounds identified in the four different white ginseng roots grown for 3–6 years (VIP value > 1 in PLS-DA).

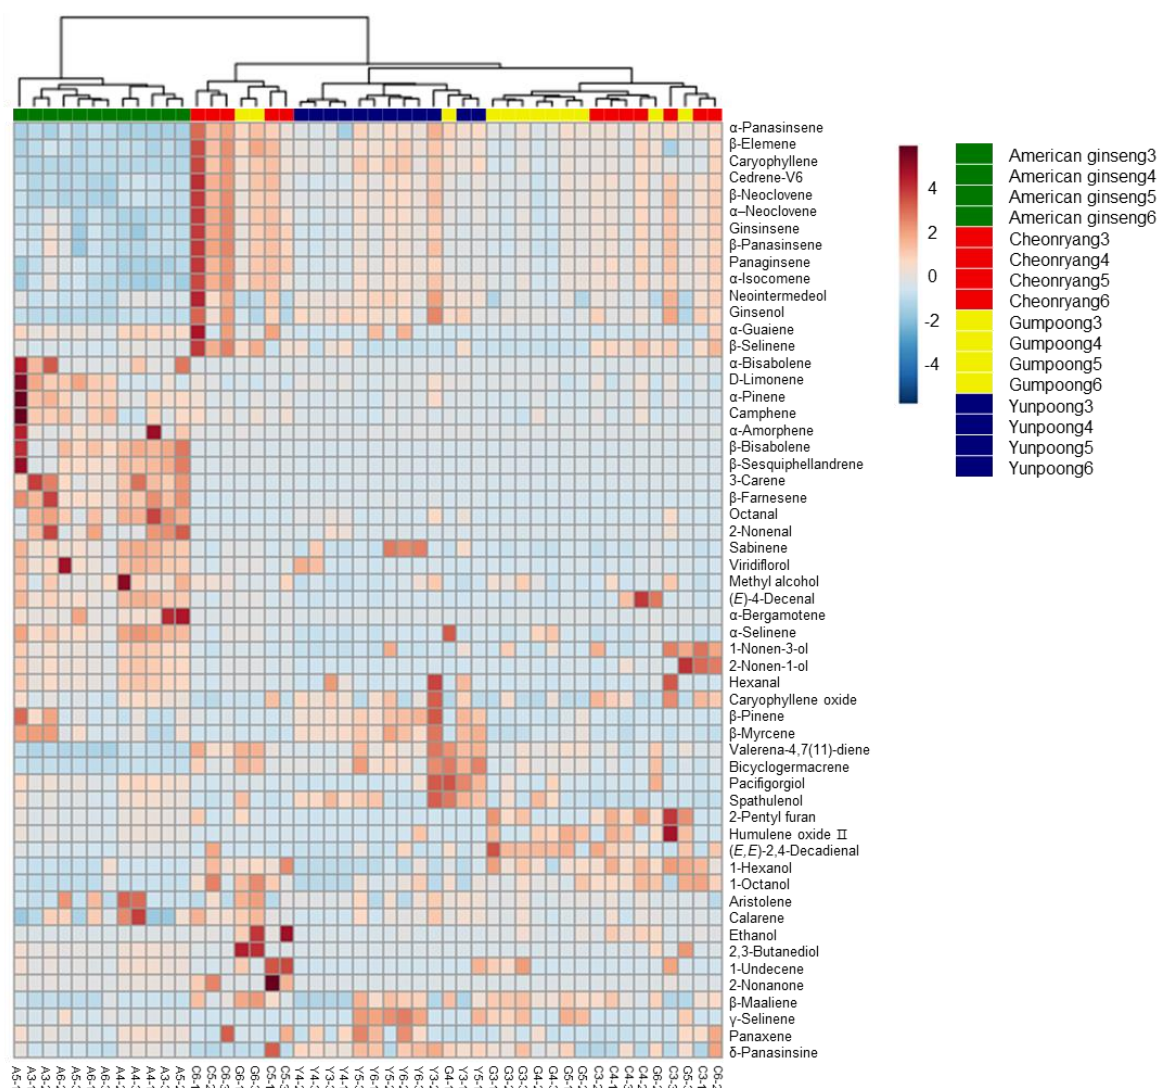

**Figure S5.** PLS-DA model validation of volatile compounds present in the four different white ginseng roots grown for 3–6 years by using permutation test

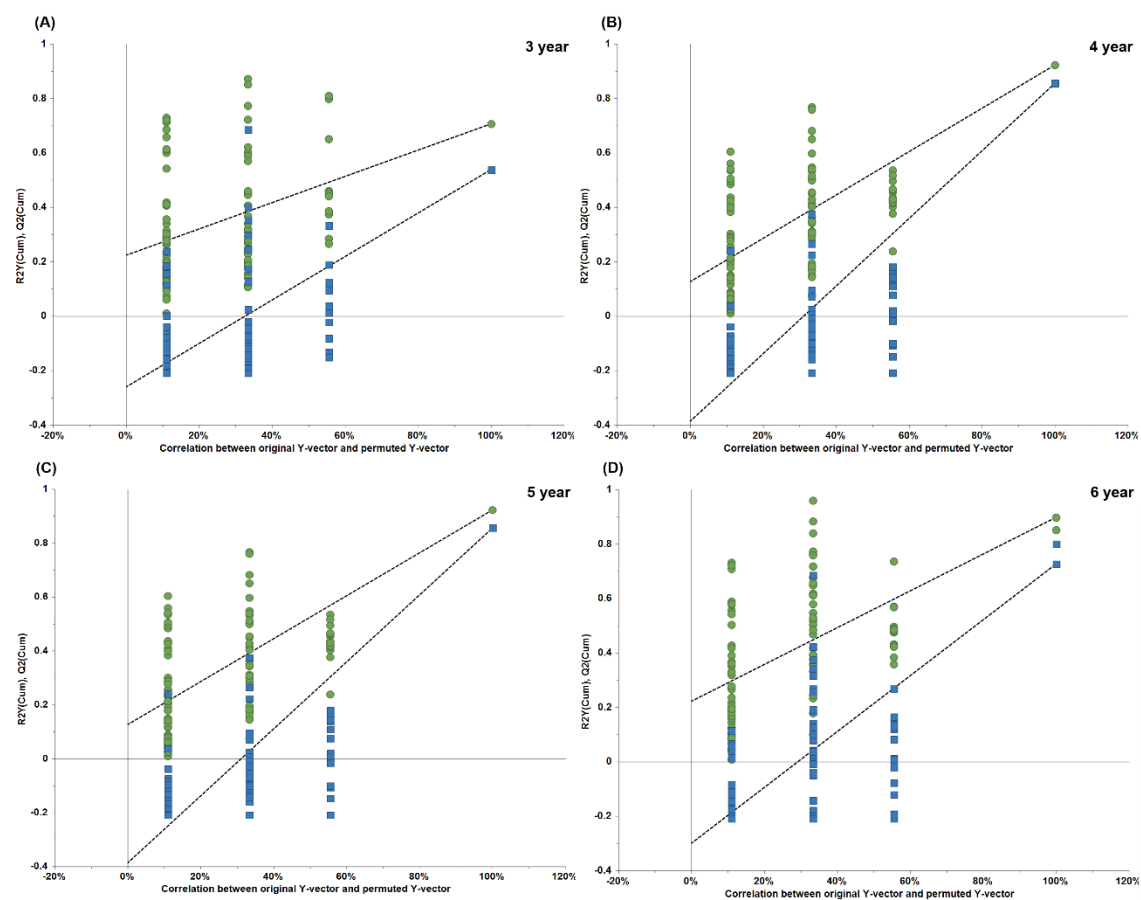

**Figure S6.** PCA score plot of different year white ginseng roots based on volatile compound data obtained from GC–MS. (A) American ginseng, (B) Yunpoong, (C) Gumpoong, and (D) Cheonryang.

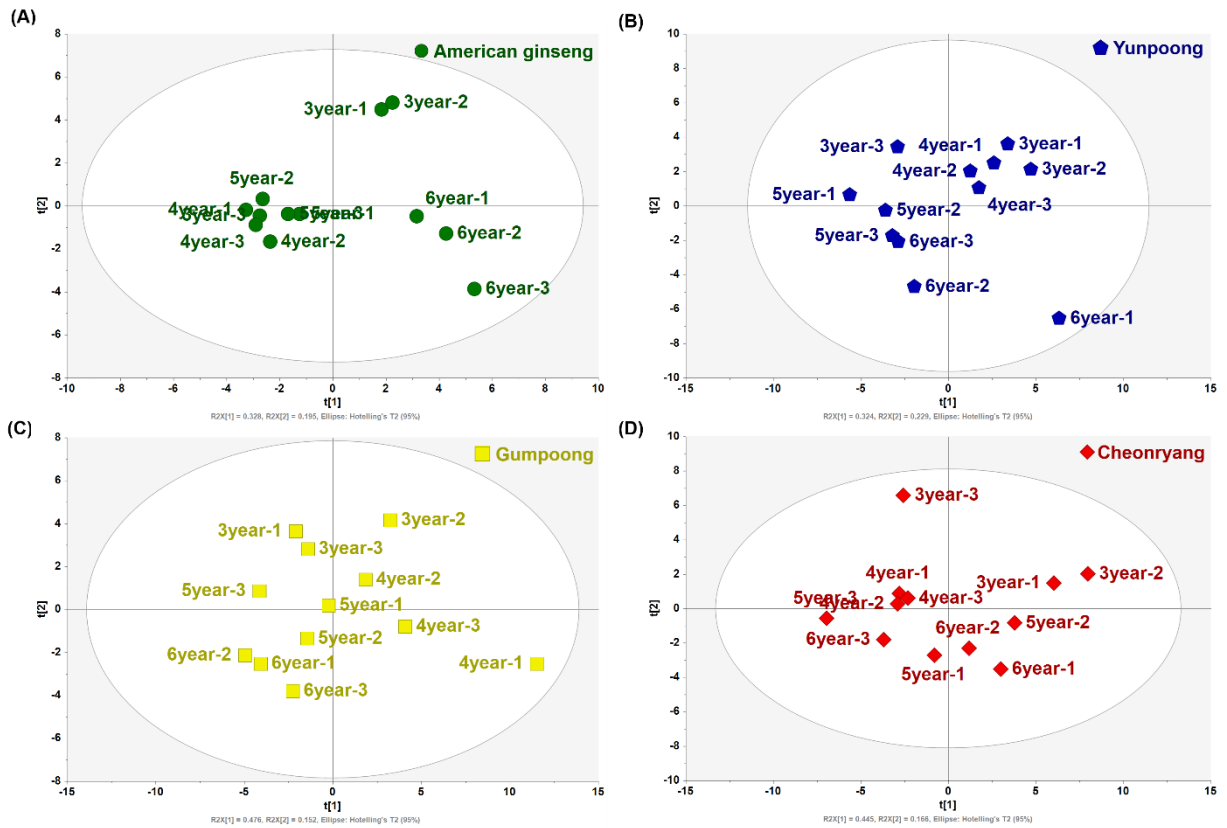

Supplement: s1 [file s1]
